# Supplementary material for: Propofol Protects Myocardium From Ischemia/Reperfusion Injury by Inhibiting Ferroptosis Through the AKT/p53 Signaling Pathway
Source: Front Pharmacol. 2022 Mar 16;13:841410. doi: 10.3389/fphar.2022.841410 (PMC8966655; doi:10.3389/fphar.2022.841410)
Supplement: Supplementary file 11 [file DataSheet12.ZIP]

Archive with 31 entries (27 files):
- Fig5一/
- Fig5一/Fig5A,G,WB.docx
- Fig5一/Fig5A-E/
- Fig5一/Fig5A-E/FTH1.jpg
- Fig5一/Fig5A-E/GPX4.jpg
- Fig5一/Fig5A-E/Gray value analysis.xlsx
- Fig5一/Fig5A-E/SOD-2.jpg
- Fig5一/Fig5A-E/XCT.jpg
- Fig5一/Fig5A-E/α-tubulin.jpg
- Fig5一/Fig5F,G/
- Fig5一/Fig5F,G/AKT.jpg
- Fig5一/Fig5F,G/Gray value analysis.xlsx
- Fig5一/Fig5F,G/P-AKT.jpg
- Fig5一/Fig5F,G/α-tubulin.jpg
- Fig5一/Fig5I,K/
- Fig5一/Fig5I,K/AKT fluorescence.xlsx
- Fig5一/Fig5I,K/Control AKT.tif
- Fig5一/Fig5I,K/Control dapi.tif
- Fig5一/Fig5I,K/Control merge.tif
- Fig5一/Fig5I,K/IR AKT.tif
- Fig5一/Fig5I,K/IR dapi.tif
- Fig5一/Fig5I,K/IR merge.tif
- Fig5一/Fig5I,K/IR+MK AKT.tif
- Fig5一/Fig5I,K/IR+MK dapi.tif
- Fig5一/Fig5I,K/IR+MK merge.tif
- Fig5一/Fig5I,K/IR+P  merge.tif
- Fig5一/Fig5I,K/IR+P AKT.tif
- Fig5一/Fig5I,K/IR+P dapi.tif
- Fig5一/Fig5I,K/IR+P+mk AKT.tif
- Fig5一/Fig5I,K/IR+P+mk dapi.tif
- Fig5一/Fig5I,K/IR+P+mk merge.tif
