# Supplementary material for: Propofol Protects Myocardium From Ischemia/Reperfusion Injury by Inhibiting Ferroptosis Through the AKT/p53 Signaling Pathway
Source: Front Pharmacol. 2022 Mar 16;13:841410. doi: 10.3389/fphar.2022.841410 (PMC8966655; doi:10.3389/fphar.2022.841410)
Supplement: Supplementary file 11 [file DataSheet12.ZIP › Fig5一/Fig5A-E/Gray value analysis.xlsx]

## Sheet: Sheet2
							Control	IR	IR+P	IR+P+MK	IR+MK
					FTH1/α-tubulin	A	1	0.263482	0.661387	0.276849	0.107309
						B	1	0.291903	0.793391	0.337629	0.110933
						C	1	0.280839	0.733391	0.327725	0.0613701
						D	1	0.212887	0.41962	0.256998	0.0881962
						E	1	0.258239	0.506076	0.315457	0.0949774
						F	1	0.231575	0.564716	0.398492	0.106529
					XCT/α-tubulin	A	1	0.550543	0.895034	0.682531	0.394079
						B	1	0.362063	0.742138	0.492759	0.309446
						C	1	0.342676	0.931034	0.396252	0.165925
						D	1	0.403774	0.947141	0.434557	0.105793
						E	1	0.38176	0.742605	0.389796	0.116636
						F	1	0.427735	0.900326	0.454471	0.103568
					SOD-2/α-tubulin	A	1	0.556661	0.870928	0.620021	0.193853
						B	1	0.531399	0.944695	0.420187	0.125123
						C	1	0.50804	0.880824	0.456033	0.0726281
						D	1	0.466428	0.866163	0.675088	0.271676
						E	1	0.360973	0.794213	0.690213	0.358981
						F	1	0.35919	0.870338	0.529231	0.150252
					GPX4/α-tubulin	A	1	0.486545	0.797858	0.482307	0.147542
						B	1	0.478783	0.714177	0.442053	0.188418
						C	1	0.531224	0.848805	0.642492	0.299373
						D	1	0.48873	0.93398	0.471419	0.302072
						E	1	0.350306	0.80148	0.403537	0.114663
						F	1	0.453853	0.898312	0.513168	0.0958968
