# Supplementary material for: Propofol Protects Myocardium From Ischemia/Reperfusion Injury by Inhibiting Ferroptosis Through the AKT/p53 Signaling Pathway
Source: Front Pharmacol. 2022 Mar 16;13:841410. doi: 10.3389/fphar.2022.841410 (PMC8966655; doi:10.3389/fphar.2022.841410)
Supplement: Supplementary file 11 [file DataSheet12.ZIP › Fig5一/Fig5F,G/Gray value analysis.xlsx]

## Sheet: Sheet2
								Control	IR	IR+P	IR+P+MK	IR+MK
						P-AKT/AKT	A	1	0.755173	0.865816	0.741139	0.493901
							B	1	0.567139	0.709933	0.537065	0.299593
							C	1	0.645197	0.748477	0.528181	0.466968
							D	1	0.628269	1.08325	0.865661	0.31502
							E	1	0.670629	0.909686	0.682331	0.222632
							F	1	0.438315	0.845756	0.571453	0.129433
