# Supplementary material for: Propofol Protects Myocardium From Ischemia/Reperfusion Injury by Inhibiting Ferroptosis Through the AKT/p53 Signaling Pathway
Source: Front Pharmacol. 2022 Mar 16;13:841410. doi: 10.3389/fphar.2022.841410 (PMC8966655; doi:10.3389/fphar.2022.841410)
Supplement: Supplementary file 11 [file DataSheet12.ZIP › Fig5一/Fig5I,K/AKT fluorescence.xlsx]

## Sheet: Sheet2
						Control	IR	IR+P	IR+P+MK	IR+MK
				AKT/Control	A	1	1.02749	1.1776	1.26096	1.07322
					B	1	1.12443	0.98044	1.10386	0.963681
					C	1	1.03669	0.962909	0.967309	0.950618
					D	1	1.20461	1.28091	0.907832	1.13173
					E	1	1.14761	1.39307	1.11506	1.24384
					F	1	0.921203	0.982656	1.00631	0.963698
