# Supplementary material for: Propofol Protects Myocardium From Ischemia/Reperfusion Injury by Inhibiting Ferroptosis Through the AKT/p53 Signaling Pathway
Source: Front Pharmacol. 2022 Mar 16;13:841410. doi: 10.3389/fphar.2022.841410 (PMC8966655; doi:10.3389/fphar.2022.841410)
Supplement: Supplementary file 12 [file DataSheet2.ZIP]

Archive with 32 entries (24 files):
- Fig2/
- Fig2/Fig2A/
- Fig2/Fig2A/CCK8 Erastin.xlsx
- Fig2/Fig2B,E/
- Fig2/Fig2B,E/Control.pdf
- Fig2/Fig2B,E/Control.tif
- Fig2/Fig2B,E/E+P.pdf
- Fig2/Fig2B,E/E+P.tif
- Fig2/Fig2B,E/E.pdf
- Fig2/Fig2B,E/E.tif
- Fig2/Fig2B,E/Trypan blue experiment H9C2 cells.xlsx
- Fig2/Fig2C,F/
- Fig2/Fig2C,F/Control.tif
- Fig2/Fig2C,F/DHE .xlsx
- Fig2/Fig2C,F/E+P.tif
- Fig2/Fig2C,F/E.tif
- Fig2/Fig2D/
- Fig2/Fig2D/Control.jpg
- Fig2/Fig2D/E+P.jpg
- Fig2/Fig2D/E.jpg
- Fig2/Fig2G/
- Fig2/Fig2G/H9c2 MDA.xlsx
- Fig2/Fig2H/
- Fig2/Fig2H/H9C2 cells Iron.xlsx
- Fig2/Fig2H/~$20210406 cell Iron.xlsx
- Fig2/Fig2I-L/
- Fig2/Fig2I-L/Fig2.WB, DataSheet.docx
- Fig2/Fig2I-L/FTH1.jpg
- Fig2/Fig2I-L/GPX4.jpg
- Fig2/Fig2I-L/Gray value analysis.xlsx
- Fig2/Fig2I-L/SOD-2.jpg
- Fig2/Fig2I-L/α-tubulin.jpg
