# Supplementary material for: Propofol Protects Myocardium From Ischemia/Reperfusion Injury by Inhibiting Ferroptosis Through the AKT/p53 Signaling Pathway
Source: Front Pharmacol. 2022 Mar 16;13:841410. doi: 10.3389/fphar.2022.841410 (PMC8966655; doi:10.3389/fphar.2022.841410)
Supplement: Supplementary file 12 [file DataSheet2.ZIP › Fig2/Fig2A/CCK8 Erastin.xlsx]

## Sheet: Sheet1
					Control
			E μM		0	DMSO	0.625	1.25	2.5	5	10	20
			Cell viability	A	1	0.987	0.981	0.972	0.79	0.615	0.25	0.13
				B	1.00032	0.994313	0.957346	0.846445	0.659716	0.418152	0.344708	0.152607
				C	1	0.950069	0.899679	0.874943	0.607421	0.459918	0.335776	0.163536
			Cell viability%		100	98.7	98.1	97.2	79	61.5	25	13
					100	99.4	95.7	84.6	66	41.8	34.5	10.3
					100	95.01	89.97	87.79	60.74	45.9918	33.5776	16.3536
