# Supplementary material for: Propofol Protects Myocardium From Ischemia/Reperfusion Injury by Inhibiting Ferroptosis Through the AKT/p53 Signaling Pathway
Source: Front Pharmacol. 2022 Mar 16;13:841410. doi: 10.3389/fphar.2022.841410 (PMC8966655; doi:10.3389/fphar.2022.841410)
Supplement: Supplementary file 12 [file DataSheet2.ZIP › Fig2/Fig2B,E/Trypan blue experiment H9C2 cells.xlsx]

## Sheet: Sheet1
						Control	E	E+P
				H9C2 cells viability%
					A	80.51	67.64	81.92
					B	97.52	59.81	90.005
					C	96.04	69.04	85.8
