# Supplementary material for: Propofol Protects Myocardium From Ischemia/Reperfusion Injury by Inhibiting Ferroptosis Through the AKT/p53 Signaling Pathway
Source: Front Pharmacol. 2022 Mar 16;13:841410. doi: 10.3389/fphar.2022.841410 (PMC8966655; doi:10.3389/fphar.2022.841410)
Supplement: Supplementary file 12 [file DataSheet2.ZIP › Fig2/Fig2C,F/DHE .xlsx]

## Sheet: Sheet1
				Control	E	E+P
		%Area	A	1	10.0967	5.18431
			B	1	15.3781	4.33216
			C	1	13.5839	5.21898
