# Supplementary material for: Propofol Protects Myocardium From Ischemia/Reperfusion Injury by Inhibiting Ferroptosis Through the AKT/p53 Signaling Pathway
Source: Front Pharmacol. 2022 Mar 16;13:841410. doi: 10.3389/fphar.2022.841410 (PMC8966655; doi:10.3389/fphar.2022.841410)
Supplement: Supplementary file 12 [file DataSheet2.ZIP › Fig2/Fig2G/H9c2 MDA.xlsx]

## Sheet: Sheet1
				Con	E	E+P
		MDA	A	10.8821	40.5875	20.2202
			B	16.5438	52.499	24.1907
			C	13.5292	46.2491	25.3678
