# Supplementary material for: Propofol Protects Myocardium From Ischemia/Reperfusion Injury by Inhibiting Ferroptosis Through the AKT/p53 Signaling Pathway
Source: Front Pharmacol. 2022 Mar 16;13:841410. doi: 10.3389/fphar.2022.841410 (PMC8966655; doi:10.3389/fphar.2022.841410)
Supplement: Supplementary file 12 [file DataSheet2.ZIP › Fig2/Fig2H/H9C2 cells Iron.xlsx]

## Sheet: Sheet3
						ConA	ConB	ConC	EA	EB	EC	E+PA	E+PB	E+PC
					Iron	127.778	126.111	102.778	187.222	215	216.111	168.889	170	178.889
