# Supplementary material for: Propofol Protects Myocardium From Ischemia/Reperfusion Injury by Inhibiting Ferroptosis Through the AKT/p53 Signaling Pathway
Source: Front Pharmacol. 2022 Mar 16;13:841410. doi: 10.3389/fphar.2022.841410 (PMC8966655; doi:10.3389/fphar.2022.841410)
Supplement: Supplementary file 12 [file DataSheet2.ZIP › Fig2/Fig2I-L/Gray value analysis.xlsx]

## Sheet: Sheet2
							Control	E	E+P	E+DMSO
					FTH1/tubulin	A	1	0.27828	0.763614	0.445991
						B	1	0.5107	0.909766	0.498574
						C	1	0.456671	0.723153	0.286474
					SOD-2/tubulin	A	1	0.357464	0.626402	0.595578
						B	1	0.515342	0.759676	0.501639
						C	1	0.529029	0.715618	0.200429
					GPX4/tubulin	A	1	0.476726	0.812142	0.260709
						B	1	0.446658	0.638094	0.391613
						C	1	0.364049	0.80435	0.493817
